# Supplementary material for: Hydrolytic synthesis and structural characterization of five hexanuclear oxo-hydroxo lanthanideclusters
Source: Royal Society of Chemistry journal article supplement (doi:10.1039/b914208h), 2009-10-01
Supplement: b914208h.pdf [file b914208h.pdf]

## Supplementary Information

### 1. Table S1 Selected bond distances (Å) for complexes 1-5

#### Complex 1

|               |            |               |            |
|---------------|------------|---------------|------------|
| Er(1)-O(13)   | 2.324(6)   | Er(2)-O(7)    | 2.383(7)   |
| Er(1)-O(15)#1 | 2.350(7)   | Er(2)-O(12)   | 2.4208(8)  |
| Er(1)-O(8)#1  | 2.367(6)   | Er(2)-N(1)#1  | 2.642(7)   |
| Er(1)-O(5)    | 2.367(6)   | Er(2)-N(5)    | 2.655(7)   |
| Er(1)-O(14)   | 2.377(6)   | Er(2)-Er(1)#1 | 3.4402(12) |
| Er(1)-O(4)    | 2.394(7)   | Er(2)-Er(3)   | 3.5166(11) |
| Er(1)-O(12)   | 2.4326(8)  | Er(3)-O(13)   | 2.274(6)   |
| Er(1)-N(6)    | 2.665(8)   | Er(3)-O(15)   | 2.277(6)   |
| Er(1)-N(2)    | 2.759(8)   | Er(3)-O(8)    | 2.294(6)   |
| Er(1)-Er(2)   | 3.4236(12) | Er(3)-O(14)   | 2.301(5)   |
| Er(1)-Er(2)#1 | 3.4402(12) | Er(3)-O(11)   | 2.361(7)   |
| Er(1)-Er(3)   | 3.5316(9)  | Er(3)-O(10)   | 2.389(7)   |
| Er(2)-O(13)   | 2.334(6)   | Er(3)-O(9)    | 2.409(7)   |
| Er(2)-O(8)#1  | 2.355(5)   | Er(3)-O(12)   | 2.5783(12) |
| Er(2)-O(14)#1 | 2.360(6)   | Er(3)-Er(2)#1 | 3.557(2)   |
| Er(2)-O(15)   | 2.371(6)   | Er(3)-Er(1)#1 | 3.5579(13) |
| Er(2)-O(6)    | 2.377(6)   |               |            |

Symmetry transformations used to generate equivalent atoms: #1 -x+1,-y+2,-z+1.

#### Complex 2

|               |            |               |            |
|---------------|------------|---------------|------------|
| Ho(1)-O(14)   | 2.327(6)   | Ho(2)-O(8)    | 2.405(7)   |
| Ho(1)-O(16)   | 2.357(6)   | Ho(2)-O(9)    | 2.410(7)   |
| Ho(1)-O(10)   | 2.358(6)   | Ho(2)-O(13)   | 2.4293(8)  |
| Ho(1)-O(15)   | 2.371(6)   | Ho(2)-N(2)#1  | 2.639(8)   |
| Ho(1)-O(11)   | 2.375(6)   | Ho(2)-N(6)    | 2.647(8)   |
| Ho(1)-O(12)   | 2.398(7)   | Ho(2)-Ho(1)#1 | 3.4503(12) |
| Ho(1)-N(5)    | 2.666(8)   | Ho(2)-Ho(3)   | 3.5333(11) |
| Ho(1)-N(1)    | 2.750(8)   | Ho(3)-O(16)   | 2.259(6)   |
| Ho(1)-Ho(2)   | 3.4374(12) | Ho(3)-O(14)   | 2.269(6)   |
| Ho(1)-Ho(2)#1 | 3.4503(12) | Ho(3)-O(10)#1 | 2.292(6)   |
| Ho(1)-Ho(3)   | 3.5466(10) | Ho(3)-O(15)#1 | 2.301(7)   |
| Ho(1)-Ho(3)#1 | 3.5765(13) | Ho(3)-O(6)    | 2.370(7)   |
| Ho(2)-O(14)   | 2.350(7)   | Ho(3)-O(5)    | 2.426(8)   |
| Ho(2)-O(15)   | 2.357(6)   | Ho(3)-O(7)    | 2.436(7)   |
| Ho(2)-O(16)#1 | 2.362(7)   | Ho(3)-O(13)   | 2.5935(12) |
| Ho(2)-O(10)#1 | 2.369(6)   | Ho(3)-Ho(2)#1 | 3.574(2)   |

Symmetry transformations used to generate equivalent atoms: #1 -x+1,-y,-z+1.

Complex 3

---

|               |            |               |            |
|---------------|------------|---------------|------------|
| Dy(1)-O(16)   | 2.339(4)   | Dy(2)-O(7)    | 2.411(5)   |
| Dy(1)-O(14)   | 2.360(4)   | Dy(2)-O(15)   | 2.4405(7)  |
| Dy(1)-O(5)    | 2.374(4)   | Dy(2)-N(8)#1  | 2.642(5)   |
| Dy(1)-O(11)   | 2.387(4)   | Dy(2)-N(4)    | 2.658(5)   |
| Dy(1)-O(13)   | 2.395(4)   | Dy(2)-Dy(1)#1 | 3.4655(11) |
| Dy(1)-O(12)   | 2.423(5)   | Dy(2)-Dy(3)#1 | 3.5450(10) |
| Dy(1)-O(15)   | 2.4527(7)  | Dy(3)-O(16)#1 | 2.275(4)   |
| Dy(1)-N(3)    | 2.670(5)   | Dy(3)-O(14)   | 2.285(4)   |
| Dy(1)-N(7)    | 2.747(6)   | Dy(3)-O(5)    | 2.298(4)   |
| Dy(1)-Dy(2)   | 3.4545(11) | Dy(3)-O(11)#1 | 2.303(4)   |
| Dy(1)-Dy(2)#1 | 3.4655(11) | Dy(3)-O(8)    | 2.383(5)   |
| Dy(1)-Dy(3)#1 | 3.5629(9)  | Dy(3)-O(9)    | 2.422(5)   |
| Dy(2)-O(16)   | 2.359(4)   | Dy(3)-O(10)   | 2.429(5)   |
| Dy(2)-O(5)    | 2.361(4)   | Dy(3)-O(15)   | 2.6060(12) |
| Dy(2)-O(14)#1 | 2.382(4)   | Dy(3)-Dy(2)#1 | 3.5451(10) |
| Dy(2)-O(11)#1 | 2.386(4)   | Dy(3)-Dy(1)#1 | 3.5630(9)  |
| Dy(2)-O(6)    | 2.404(4)   |               |            |

---

Symmetry transformations used to generate equivalent atoms: #1 -x+1,-y+1,-z+1.

Complex 4

---

|               |           |               |            |
|---------------|-----------|---------------|------------|
| Cl(5)-Gd(2)   | 2.777(5)  | Gd(2)-O(7)    | 2.430(7)   |
| Gd(1)-O(11)   | 2.373(6)  | Gd(2)-O(10)   | 2.597(6)   |
| Gd(1)-O(8)#1  | 2.385(6)  | Gd(2)-O(6)    | 2.617(7)   |
| Gd(1)-O(9)    | 2.387(6)  | Gd(2)-N(1)    | 2.700(8)   |
| Gd(1)-O(14)   | 2.392(6)  | Gd(2)-Gd(1)#1 | 3.6216(9)  |
| Gd(1)-O(15)   | 2.445(6)  | Gd(2)-Gd(3)#1 | 3.6404(18) |
| Gd(1)-O(16)   | 2.456(6)  | Gd(3)-O(9)#1  | 2.352(6)   |
| Gd(1)-O(10)   | 2.4598(7) | Gd(3)-O(14)#1 | 2.363(6)   |
| Gd(1)-N(5)    | 2.717(8)  | Gd(3)-O(8)#1  | 2.383(6)   |
| Gd(1)-N(2)    | 2.744(7)  | Gd(3)-O(14)   | 2.400(6)   |
| Gd(1)-Gd(2)   | 3.5135(8) | Gd(3)-O(17)   | 2.451(7)   |
| Gd(1)-Gd(3)   | 3.5232(8) | Gd(3)-O(13)   | 2.462(7)   |
| Gd(1)-Gd(3)#1 | 3.6114(9) | Gd(3)-O(10)   | 2.572(6)   |
| Gd(2)-O(8)    | 2.341(6)  | Gd(3)-O(12)   | 2.575(7)   |
| Gd(2)-O(11)#1 | 2.353(6)  | Gd(3)-N(6)    | 2.668(8)   |
| Gd(2)-O(9)    | 2.371(6)  | Gd(3)-Gd(1)#1 | 3.6113(9)  |
| Gd(2)-O(11)   | 2.387(6)  | Gd(3)-Gd(2)#1 | 3.6404(18) |

---

Symmetry transformations used to generate equivalent atoms: #1 x,-y+1/2,-z+1/2.

Complex 5

---

|               |            |               |            |
|---------------|------------|---------------|------------|
| Cl(4)-Tb(4)   | 2.700(7)   | O(15)-Tb(3)#1 | 2.416(8)   |
| N(7)-Tb(4)    | 2.685(9)   | O(16)-Tb(3)   | 2.351(7)   |
| N(8)-Tb(2)    | 2.720(9)   | O(16)-Tb(4)   | 2.361(7)   |
| O(6)-Tb(4)    | 2.442(9)   | O(16)-Tb(2)   | 2.377(8)   |
| O(7)-Tb(4)    | 2.641(9)   | O(17)-Tb(2)   | 2.376(7)   |
| O(8)-Tb(3)    | 2.469(8)   | O(17)-Tb(4)   | 2.396(8)   |
| O(9)-Tb(3)    | 2.593(8)   | Tb(1)-O(14)#1 | 2.383(8)   |
| O(10)-Tb(2)   | 2.441(7)   | Tb(1)-O(15)#1 | 2.398(7)   |
| O(11)-Tb(3)   | 2.427(9)   | Tb(1)-O(12)#1 | 2.483(8)   |
| O(12)-Tb(1)   | 2.483(8)   | Tb(1)-N(2)#1  | 2.743(10)  |
| O(13)-Tb(1)   | 2.440(10)  | Tb(1)-Tb(3)#1 | 3.5163(9)  |
| O(13)-Tb(2)   | 2.476(10)  | Tb(1)-Tb(3)   | 3.5163(9)  |
| O(13)-Tb(4)#1 | 2.5671(12) | Tb(1)-Tb(4)#1 | 3.6101(11) |
| O(13)-Tb(4)   | 2.5671(12) | Tb(2)-O(17)#1 | 2.376(7)   |
| O(13)-Tb(3)#1 | 2.5857(7)  | Tb(2)-O(16)#1 | 2.377(8)   |
| O(13)-Tb(3)   | 2.5858(7)  | Tb(2)-O(10)#1 | 2.441(7)   |
| O(14)-Tb(4)   | 2.322(7)   | Tb(2)-Tb(4)   | 3.4959(11) |
| O(14)-Tb(1)   | 2.383(8)   | Tb(2)-Tb(4)#1 | 3.4959(11) |
| O(14)-Tb(3)   | 2.387(7)   | Tb(2)-Tb(3)#1 | 3.6185(9)  |
| O(15)-Tb(4)   | 2.345(8)   | Tb(3)-O(17)#1 | 2.348(7)   |
| O(15)-Tb(1)   | 2.398(7)   | Tb(3)-Tb(4)   | 3.6241(14) |

---

Symmetry transformations used to generate equivalent atoms: #1 -x,y,-z+1/2.

## 2. Magnetic data for complex 1,2,3,5

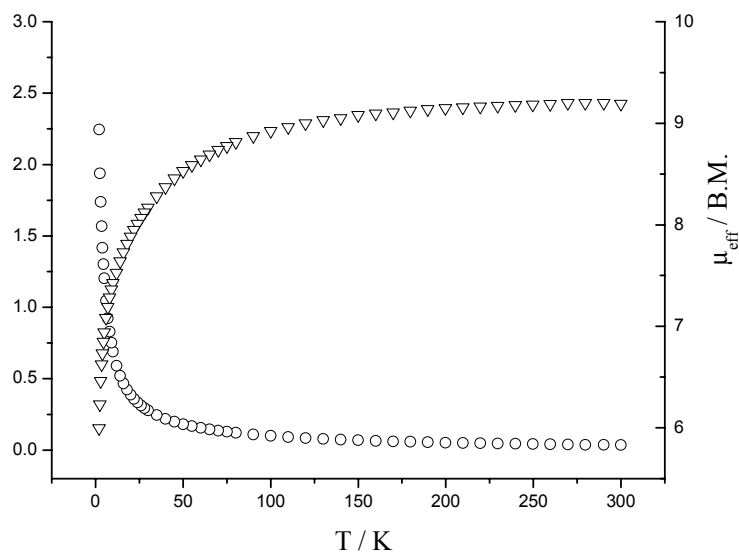

Fig S1. Experimental variations of  $\chi_M$  (O) and  $\mu_{\text{eff}}$  ( $\nabla$ ) versus T for complex 1

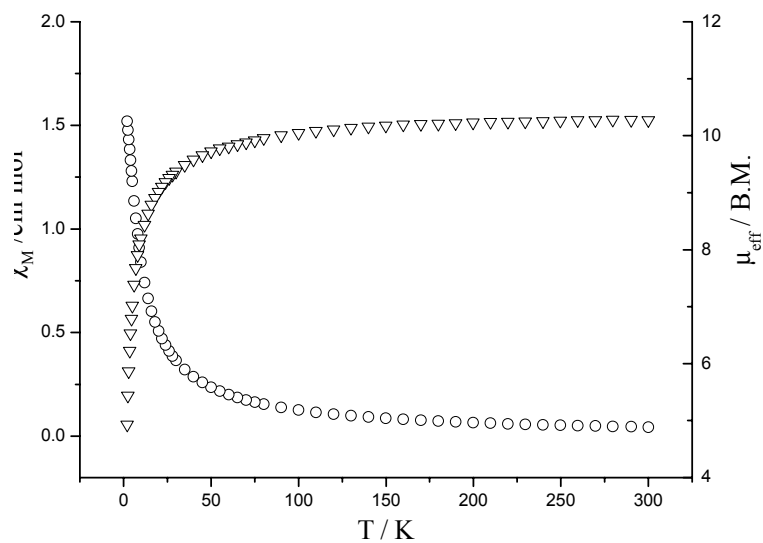

Fig S2. Experimental variations of  $\chi_M$  (O) and  $\mu_{\text{eff}}$  ( $\nabla$ ) versus T for complex 2

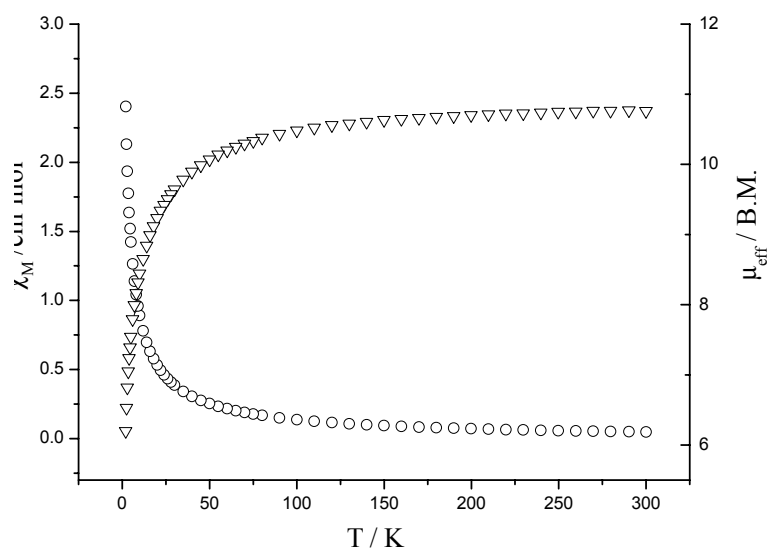

Fig S3. Experimental variations of  $\chi_M$  (O) and  $\mu_{\text{eff}}$  ( $\nabla$ ) versus T for complex **3**

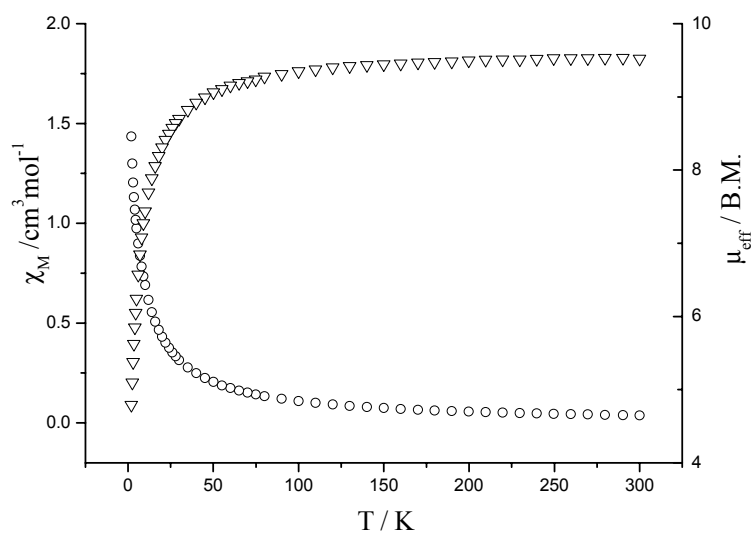

Fig S4. Experimental variations of  $\chi_M$  (O) and  $\mu_{\text{eff}}$  ( $\nabla$ ) versus T for complex **5**
